# Supplementary material for: Emerging investigator series: low doses of electron beam irradiation effectively degrade 1,4-dioxane in water within a few seconds
Source: Royal Society of Chemistry journal article supplement (doi:10.1039/d3ew00111c), 2023-01-01
Supplement: d3ew00111c1.pdf [file d3ew00111c1.pdf]

1 **Supporting Information**

2

3 **Low doses of electron beam irradiation effectively degrade 1,4-dioxane in water within a few**  
4 **seconds**

5

6 Cheng-Shiuan Lee<sup>1,2</sup>, Kaushik Londhe<sup>1,3</sup>, Slavica Grdanovska<sup>4</sup>, Charlie A. Cooper<sup>4</sup>, and Arjun K.  
7 Venkatesan<sup>1,3,5,†</sup>

8

9 <sup>1</sup> New York State Center for Clean Water Technology, Stony Brook University, Stony Brook, New  
10 York 11794, United States

11 <sup>2</sup> Research Center for Environmental Changes, Academia Sinica, Taipei 115, Taiwan

12 <sup>3</sup> Department of Civil Engineering, Stony Brook University, Stony Brook, New York 11794, United  
13 States

14 <sup>4</sup> Fermi National Accelerator Laboratory, Batavia, Illinois 60510, United States

15 <sup>5</sup> School of Marine and Atmospheric Sciences, Stony Brook University, Stony Brook, New York  
16 11794, United States

17 † Corresponding author; Phone: +1 631-632-1998; Email: arjun.venkatesan@stonybrook.edu

18

19

20

21

22 **Table S1.** Characterization of groundwater matrix

| Water Quality parameter                  | Groundwater |
|------------------------------------------|-------------|
| Conductivity ( $\mu\text{S}/\text{cm}$ ) | 208         |
| ORP (mV)                                 | 173         |
| Alkalinity (mg/L as $\text{CaCO}_3$ )    | 430         |
| Chloride (mg/L)                          | 21.6        |
| Sulfate (mg/L)                           | 1.18        |
| Total Organic Carbon (mg C/L)            | 5.10        |
| Ammonia (mg N/L)                         | 1.29        |
| TKN (mg N/L)                             | 1.70        |
| Nitrate + Nitrite (mg N/L)               | 0.01        |
| Nitrite (mg N/L)                         | 0.01        |
| Orthophosphate (mg P/L)                  | BDL         |

23

24

25 **Table S2.** Instrument conditions of GC/MS, HPLC, and IC

**(a) GC/MS**

**Inlet**

Injection volumn: 1  $\mu\text{L}$ , Splitless injection  
Inlet temp: 200  $^{\circ}\text{C}$

**Column**

J&W CP-Select 624 CB  
(30 m x 0.25 mm, 1.4  $\mu\text{m}$  film thickness)  
Column Flow Rate: 1mL/min (Helium)

**Oven temperature program**

1. 30  $^{\circ}\text{C}$  (hold for 1 min)
  2. 90  $^{\circ}\text{C}$  (ramp at 7  $^{\circ}\text{C}/\text{min}$ )
  3. 200  $^{\circ}\text{C}$  (ramp at 20  $^{\circ}\text{C}/\text{min}$ , hold for 3 min)
- Total run time: 18 min

**MS condition**

MS transfer line temp: 150  $^{\circ}\text{C}$   
MS source temp: 150  $^{\circ}\text{C}$   
MS quad temp: 150  $^{\circ}\text{C}$

**Scan mode-SIM**

THF-*d8*: m/z 46,78, and 80 (6 to 8 min)  
1,4-Dioxane: m/z 58, 88 (8 to 18 min)  
1,4-Dioxane-*d8*: m/z 62, 64, 96 (8 to 18 min)

26

**(b) HPLC**

Injection volumn: 50  $\mu\text{L}$   
Column: Agilent ZOBRAx RP C18  
(250 mm x 4.6 mm, 5  $\mu\text{m}$ )  
Flow rate: 1 mL/min  
Eluent:  $\text{CH}_3\text{CN}:\text{H}_2\text{O}$  (70:30, v/v)  
Detection: 210 nm  
Total run time: 15 min

**(c) IC**

Injection volumn: 250  $\mu\text{L}$   
Column: Metrohm A Supp anion column  
(100 mm x 7.8 mm, 9  $\mu\text{m}$ )  
Flow rate: 0.7 mL/min  
Eluent:  $\text{NaHCO}_3$  (1.0 mM) +  $\text{NaCO}_3$  (3.2 mM)  
Detection: Conductivity  
Total run time: 20 min

27

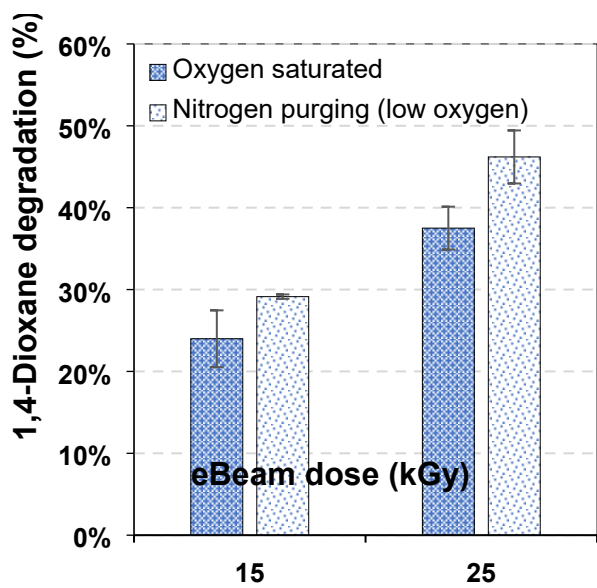

28

29 **Figure S1.** Effect of dissolved oxygen levels on 1,4-dioxane degradation. Initial 1,4-dioxane  
30 concentration: 1000 mg/L in MQW

31
